# Supplementary material for: Functional ectomycorrhizae between Tuber umbilicatum and Quercus glauca: Implications for seedling performance and phosphorus acquisition
Source: Research Square preprint supplement (doi:10.21203/rs.3.rs-7515518/v1), 2025-09-11
Supplement: Supplementary file 1 [file fa72f8ba3c441ff9d0696082.docx]

ITS sequencing of the synthesised ectomycorrhizae confirmed their identity as *T. umbilicatum* (GenBank accession no. PQ657276), designated as mycorrhiza UM11 (Fig. S1).


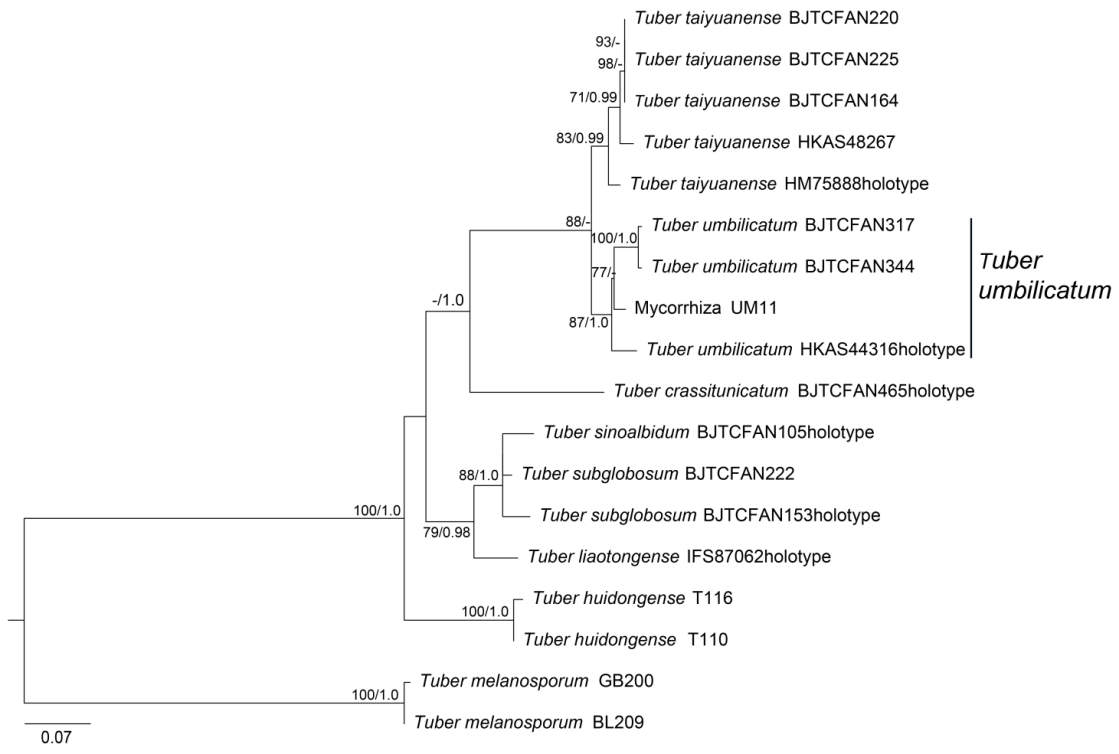


**Fig. S1** ML tree inferred from the ITS sequences. Bootstrap values (≥ 70) and Posterior Probabilities (≥ 0.90) obtained from Bayesian Inference are indicated along nodes

**Table S1** Content of available N, P, K in mycorrhizosphere substrate on different stages of inoculated and uninoculated *T. umbilicatum*

| Sampling period | Treatment | Available nitrogen (mg/kg) | Available phosphorus (mg/kg) | Available potassium (mg/kg) |
| --- | --- | --- | --- | --- |
| M2 | CK | 31.85±0.88a | 46.98±1.51b | 322.66±2.60c |
| *T. umbilicatum* | 32.84±0.65A | 47.53±2.13C | 323.20±2.18B |
| M4 | CK | 33.32±0.33a | 46.92±1.66b | 326.92±1.58b |
| *T. umbilicatum* | 32.87±1.05A | 48.42±0.81BC | 327.99±2.44B |
| M6 | CK | 32.39±2.04a | 48.47±0.88ab | 331.03±2.29a |
| *T. umbilicatum* | 32.76±2.71A | 50.77±1.52B | 339.54±3.96A |
| M8 | CK | 32.68±2.00a | 49.67±0.28a* | 332.52±1.21a |
| *T. umbilicatum* | 33.8±0.71A | 55.11±1.50A* | 341.97±4.11A |

Note: CK: Control treatment; T. umbilicatum: inoculation treatment; M2, M4, M6, M8: samples collected 2, 4, 6, and 8 months after inoculation, respectively. Different lowercase letters indicate significant differences (p < 0.05) among different sampling periods for control treatment plants; different uppercase letters indicate significant differences (p < 0.05) among different sampling periods for *T. umbilicatum* inoculation treatment plants. * indicates a significant difference (p < 0.05) between the control treatment and the *T. umbilicatum* inoculation treatment at the same period
